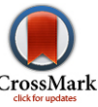

# Proteomics of Vitreous Humor of Patients with Exudative Age-Related Macular Degeneration

Michael Janusz Koss<sup>1,2,3\*</sup>, Janosch Hoffmann<sup>4</sup>, Nauke Nguyen<sup>1</sup>, Marcel Pfister<sup>2</sup>, Harald Mischak<sup>4,5</sup>, William Mullen<sup>5</sup>, Holger Husi<sup>5</sup>, Robert Rejdak<sup>6</sup>, Frank Koch<sup>1</sup>, Joachim Jankowski<sup>7</sup>, Katharina Krueger<sup>7</sup>, Thomas Bertelmann<sup>8</sup>, Julie Klein<sup>4</sup>, Joost P. Schanstra<sup>4,9,10</sup>, Justyna Siwy<sup>4,7</sup>

**1** Department of Ophthalmology, Goethe University, Frankfurt am Main, Germany, **2** Doheny Eye Institute, Los Angeles, California, United States of America, **3** Department of Ophthalmology, Ruprecht Karls University, Heidelberg, Germany, **4** Mosaïques Diagnostics, Hannover, Germany, **5** BHF Glasgow Cardiovascular Research Centre, University of Glasgow, Glasgow, United Kingdom, **6** Department of General Ophthalmology, Lublin University, Poland, **7** Department of Nephrology, Endocrinology, and Transplantation Medicine Charité-Universitätsmedizin, Berlin, Germany, **8** Department of Ophthalmology, Philipps University, Marburg, Germany, **9** Institut National de la Santé et de la Recherche Médicale (INSERM), U1048, Institut of Cardiovascular and Metabolic Disease, Toulouse, France, **10** Université Toulouse III Paul-Sabatier, Toulouse, France

## Abstract

**Background:** There is absence of specific biomarkers and an incomplete understanding of the pathophysiology of exudative age-related macular degeneration (AMD).

**Methods and Findings:** Eighty-eight vitreous samples (73 from patients with treatment naïve AMD and 15 control samples from patients with idiopathic floaters) were analyzed with capillary electrophoresis coupled to mass spectrometry in this retrospective case series to define potential candidate protein markers of AMD. Nineteen proteins were found to be upregulated in vitreous of AMD patients. Most of the proteins were plasma derived and involved in biological (ion) transport, acute phase inflammatory reaction, and blood coagulation. A number of proteins have not been previously associated to AMD including alpha-1-antitrypsin, fibrinogen alpha chain and prostaglandin H2-D isomerase. Alpha-1-antitrypsin was validated in vitreous of an independent set of AMD patients using Western blot analysis. Further systems biology analysis of the data indicated that the observed proteomic changes may reflect upregulation of immune response and complement activity.

**Conclusions:** Proteome analysis of vitreous samples from patients with AMD, which underwent an intravitreal combination therapy including a core vitrectomy, steroids and bevacizumab, revealed apparent AMD-specific proteomic changes. The identified AMD-associated proteins provide some insight into the pathophysiological changes associated with AMD.

**Citation:** Koss MJ, Hoffmann J, Nguyen N, Pfister M, Mischak H, et al. (2014) Proteomics of Vitreous Humor of Patients with Exudative Age-Related Macular Degeneration. PLoS ONE 9(5): e96895. doi:10.1371/journal.pone.0096895

**Editor:** Sanjoy Bhattacharya, Bascom Palmer Eye Institute, University of Miami School of Medicine, United States of America

**Received:** August 20, 2013; **Accepted:** April 11, 2014; **Published:** May 14, 2014

**Copyright:** © 2014 Koss et al. This is an open-access article distributed under the terms of the Creative Commons Attribution License, which permits unrestricted use, distribution, and reproduction in any medium, provided the original author and source are credited.

**Funding:** The study was financed in part by the Adolf Messer Stiftung in Königstein, Hessen, Germany; No additional external funding was received for this study. <http://www.adolf-messer-stiftung.de/>. The funders had no role in study design, data collection and analysis, decision to publish, or preparation of the manuscript.

**Competing Interests:** The authors have declared that no competing interests exist.

\* E-mail: Michael.koss@me.com

## Introduction

Age dependent alterations of the retinal pigment epithelium (RPE) and its basal membrane, called Bruchs membrane, are widely accepted as the main pathophysiological reason for age-related macular degeneration (AMD) and is thus the leading cause of blindness in people over the age of 60 years in industrialized countries [1]. The upregulation of vascular endothelial growth factor (VEGF) and the development of a choroidal neovascularization (CNV) are the blueprint for the conversion to the exudative or wet AMD form. Our understanding today of the disease and the interaction of intravitreal anti-VEGF treatment is thereby coined and determined by clinical diagnostics, mainly optical coherence tomography and fluorescein angiography. Since AMD is a pure retinochoroidal disease, circulating *in vivo* biomarkers such as HbA1c in the diagnosis and treatment of diabetes are still absent for AMD. Samples from the human vitreous might best

qualify as a source of biomarkers for AMD due to the proximity to the retina and the efflux of cytokines into the vitreous cavity [2]. However, most published protein analyses in exudative AMD derive from experimental animal models, *ex vivo* samples or *in vivo* from ocular anterior chamber aspirates (AC) with the incorporated flaws [3,4,5,6]. Ecker et al. demonstrated, that cytokine and growth factor levels from the AC do not reliably reflect those levels found in the vitreous and thus it is questionable to assess the activity of a purely retinochoroidal disease by examining an AC aspirate [2,7,8]. But results from vitreous samples in AMD are scarce and published data differs on patient selection, sampling technique and analysis method [7,9,10,11,12,13,14,15].

Proteome analysis allows the simultaneous assessment of a large number of proteins in a sample. Proteome analyses have been performed in a variety of ocular diseases, including primary open-angle glaucoma and cataract [16,17,18]. Further exploration of vitreous protein profiles was performed even tough clinical factors,

like consistency of the vitreous, length of the eye, attachment of the posterior hyaloid are to date neglected in the literature [19]. Especially in the context of wet AMD the current proteomic data on vitreous or aqueous humor are incomplete.

Capillary electrophoresis coupled to mass spectrometry (CE-MS) is a powerful and very reproducible technology platform with known performance characteristics [20]. This automated, sensitive, fast proteome analysis technique [21] using CE as a front-end fractionation coupled to mass spectrometry, separates peptides and small proteins (<20 kDa) based on migration in the electrical field with high resolution in a single step. It enables analysis of thousands of peptides per sample using a sub-microliter sample volume and it has been used in numerous clinical biomarker studies, mostly examining urine as the specimen of interest [22,23].

In this pilot study, we performed a bottom-up analysis combining the reproducibility of CE-MS for selection of candidate marker proteins, and LC-MS/MS for sequence identification of these markers in vitreous of 73 AMD patients and controls. This led to the identification of a number of candidate proteins not previously shown to be involved in AMD. Systems biology analysis of the data suggested an increase in immune response, complement activation and protease activity to be involved in the pathophysiology of AMD.

## Material and Methods

### Sampling and patient characteristics

Vitreous samples were acquired at the beginning of an intravitreal combination treatment for wet AMD, which involved a 23-gauge core vitrectomy of at least 4 cc vitreous, before the application of bevacizumab, triamcinolone, and dexamethasone [22]. The same surgical technique was applied for the removal of idiopathic vitreous floaters, substituting balanced salt solution (BSS Plus, Alcon, Freiburg, Germany). This study adhered to the Declaration of Helsinki and was approved by the Investigational Review Board of the Goethe University. Written informed consent was obtained from all participants, explaining the risks and benefits of the treatment (the advantage of a combination treatment for wet AMD rather than with anti-VEGF monotherapy is summarized here [24,25,26]; the vitreous samples would otherwise have been disposed).

A total of 88 undiluted and previously untreated (any intravitreal drug application) samples were analyzed (**Table 1**). The 73 AMD samples came from 73 patients (50 women 23 men) with a mean age  $77.8 \pm 8.9$  years (standard deviation). Sixteen of the 73 patients had a hemorrhagic CNV; 37 had an active CNV (10 with signs accompanying bleeding); 13 had a CNV and greater than 80% fibrous staining in the fluorescein angiography (FA); and 7 had a CNV-associated RPE detachment and no intraretinal fluid. These classifications were assigned after a complete ocular examination, which included a slit-lamp biomicroscopy, indirect ophthalmoscopy, color fundus photography, spectral domain optical coherence tomography (3D-OCT 2000, Topcon, Willich, Germany), and FA. Patients with previous intravitreal anti-VEGF treatment, including intraocular steroids, or systemic diabetes, nephropathy or uncontrolled hypertension were excluded. Patients with any other compromising ocular condition, such as diabetic retinopathy or uveitis, were also considered ineligible for this study.

All patients were recruited from the retina clinic of the department of ophthalmology from the Goethe University in Frankfurt am Main in Germany. Vitreous samples from 15 patients with idiopathic floaters (8 women, 7 men; mean age 60  $\pm$

**Table 1. Epidemiology of the samples.**

|                          | Number | Age ( $\pm$ SD) | Sex |    | Eye |    |  |
|--------------------------|--------|-----------------|-----|----|-----|----|--|
|                          |        |                 | F   | M  | RE  | LE |  |
| AMD                      |        |                 |     |    |     |    |  |
| Hemorrhagic CNV Bleeding | 16     | 80.8 $\pm$ 9.0  | 15  | 1  | 6   | 10 |  |
| CNV                      | 10     | 77.7 $\pm$ 10.5 | 4   | 6  | 8   | 2  |  |
| With blood signs         |        |                 |     |    |     |    |  |
| Without blood signs      | 27     | 77.2 $\pm$ 7.4  | 17  | 10 | 12  | 15 |  |
| Fibrous                  | 13     | 75.4 $\pm$ 8.1  | 9   | 4  | 8   | 5  |  |
| RPE-Detachment           | 7      | 78.3 $\pm$ 12.9 | 5   | 2  | 4   | 3  |  |
| Control                  | 15     | 60.0 $\pm$ 16.0 | 8   | 7  | 6   | 9  |  |

SD = standard deviation, F = female, M = male, RE/LE = right/left eye, CNV = choroidal neovascularization, AMD = age related macular degeneration, RPE = retinal pigment epithelium.  
doi:10.1371/journal.pone.0096895.t001

16 years) served as controls. All vitreous samples were stored at  $-80^{\circ}\text{C}$ .

### Tryptic digestion of vitreous

A 10- $\mu\text{L}$  portion of the thawed sample was diluted with 90  $\mu\text{L}$  0.1% SDS, 20 mM DTT, and 0.1 M TrisHCl (pH = 7.6). The sample was sonicated at room temperature for 30 minutes to decrease viscosity and break up hyaluronic polymers contained in the vitreous humor. This was followed by denaturation at  $95^{\circ}\text{C}$  for 3 min. Samples were subsequently incubated with 80 mM Iodoacetamide at room temperature for 30 min in the absence of light, followed by the addition of ammonium bicarbonate buffer solution (300  $\mu\text{L}$ , 50 mM) and applied to NAP-5 columns equilibrated in 50 mM ammonium bicarbonate buffer solution.

Twenty  $\mu\text{g}$  of Lyophilized trypsin was dissolved in 50  $\mu\text{L}$  of buffer solution provided with the lyophilized product. Two  $\mu\text{L}$  of this solution was added to the desalted sample. Trypsin digestion was carried out overnight at a temperature of  $37^{\circ}\text{C}$ . Subsequently the samples were lyophilized, stored at  $4^{\circ}\text{C}$  and resuspended in HPLC-grade  $\text{H}_2\text{O}$  shortly before mass spectrometry analysis.

### CE-MS analysis

CE-MS analysis was performed as described by Theodorescu et al [27]. A P/ACE MDQ capillary electrophoresis system (Beckman Coulter, Brea, CA) was linked online to a micro-TOF MS (Bruker Daltonik, Leipzig, Germany). The sprayer (Agilent Technologies, Santa Clara, CA) interfacing the CE and MS was grounded and the interface potential was adjusted to  $-4.5$  kV. Signals were recorded at an  $m/z$  range of 350–3000. The detection limit of the TOF-Analyzer is in the range of 1 fmol [27].

### Data processing

Analysis of raw CE-MS data was carried out using Mosaiques-Visu [28]. MosaiquesVisu uses isotope identification and conjugated mass detection for mass deconvolution. Signals with a signal-to-random noise ratio  $>4$  and charge  $>1$  were used. Mass spectral ion peaks from the same molecule at different charge states were deconvoluted into a single mass.

In total, 292 signals for mass and CE-time with a frequency  $\geq 35\%$  could be determined that served as reference signals for normalization of peptide CE-time and mass using linear regression. For signal intensity normalization, 22 internal standards were selected that were consistently detected in vitreous samples (average frequency 83%) and that did not appear to be significantly associated with the disease. This signal intensity normalization using internal standards has been shown to be a reliable method to address both analytical and biological variances in biological samples [29].

The normalized peptides were deposited, matched, and annotated in a Microsoft SQL database. Peptides were considered identical when deviation of mass was  $< \pm 50$  ppm for an 800 Da peptide. The mass deviation was adjusted by an increase in size of up to  $\pm 75$  ppm for 15 kDa. Peptides were considered identical if the CE-migration time window did not exceed 2–5%, continuously increasing between 19 and 50 min. A number of peptides were only sporadically observed. To eliminate such low relevance peptides, all peptides that appeared only once were removed and were not considered for further analysis.

### Tandem mass spectrometry (MS/MS) sequencing

For MS/MS analysis five lyophilized, tryptic-digested randomly selected vitreous samples were dissolved in 15  $\mu\text{L}$  distilled water. Fractionation was carried out according to Metzger et al. [30]

using a Dionex Ultimate 3000 Nano LC System (Dionex, Camberly, UK). After loading (5  $\mu\text{L}$ ) onto a Dionex  $0.1 \times 20$  mm 5  $\mu\text{m}$  C18 nano trap column at a flowrate of 5  $\mu\text{L}/\text{min}$  in 98% 0.1% formic acid and 2% acetonitrile, sample was eluted onto an Acclaim PepMap C18 nano column  $75 \mu\text{m} \times 15$  cm, 2  $\mu\text{m}$  100  $\text{\AA}$  at a flow rate of 0.3  $\mu\text{L}/\text{min}$ . The trap and nano flow column were maintained at  $35^{\circ}\text{C}$ . The samples were eluted with a gradient of solvent A:98% 0.1% formic acid, 2% acetonitrile versus solvent B: 80% acetonitrile, 20% 0.1% formic acid starting at 1% B for 5 minutes rising to 20% B after 90 min and finally to 40%B after 120 min. The column was then washed and re-equilibrated prior to the next injection. The eluant was ionized using a Proxeon nano spray ESI source operating in positive ion mode into an Orbitrap Velos FTMS (Thermo Finnigan, Bremen, Germany). Ionization voltage was 2.6 kV and the capillary temperature was  $200^{\circ}\text{C}$ . The mass spectrometer was operated in MS/MS mode scanning from 380 to 2000 amu. The top 20 multiply charged ions were selected from each scan for MS/MS analysis using HCD at 40% collision energy. The resolution of ions in MS1 was 60,000 and 7,500 for HCD MS2. The MS data and the human, non redundant database IPI were matched using the SEQUEST software. Trypsin was used as the enzyme while screening for proteins. Hydroxylated proline from collagen fragments and oxidation of methionine were accepted as variable modifications and carbamidomethylated cysteine as fixed modification. A maximal mass deviation of 10 ppm for MS and 0.8 Da for MS/MS was accepted. Only proteins represented by a minimum two peptides were accepted in LC-MS/MS analysis. The sequences were matched to the detected CE-MS data as described by Züribig et al [19]. Although in this matching procedure the LC retention time can not be used, CE-MS data generate an additional parameter that can be used in this matching procedure, which is the charge of the peptides (at low pH, the condition in which peptides are analysed by CE-MS). Therefore, even when having identical or very close masses in the LC-MS/MS analysis, discrimination between peptides with similar masses can be performed on the basis of their charge. This is due to the fact that the number of basic and neutral polar amino acids of peptide sequences distinctly correlates with their CE-MS migration time/molecular weight coordinates. In nearly all cases this allows linking a unique LC-MS/MS peptide to a CE-MS peptide as shown previously [19].

CE-MS peptides with sequencing information were combined for each protein. Protein abundance was calculated as the average of all normalized CE-MS peptide intensities for the given protein. Mean protein abundance in the case group was compared to the mean protein abundance in the control group. Protein entries were mapped to the SwissProt database using either the mapping service provided by UniProt or via Blast searching ([web.expasy.org/blast/](http://web.expasy.org/blast/)) and merged according to the SwissProt names.

### Biomarker definition

Candidate AMD biomarkers were defined by examination of differences in frequency and signal intensity of the proteins between the AMD patients and controls. Mean CE-MS based protein signal intensity was used as a measure for relative abundance. Statistical analysis was performed using Graph Pad Prism 5.0 software. A F-test was performed to test for data distribution. When data were normally distributed, a parametric t-test was performed; otherwise, the statistical analysis was performed using a Mann-Whitney test or Wilcoxon signed rank test. Multiple hypotheses testing correction was performed using the Benjamini-Hochberg test for false discovery rate [31].

## Bioinformatics analysis

Gene ontology (GO) keyword-cluster analysis was done using CytoScape ([www.cytoscape.org](http://www.cytoscape.org)) and the ClueGO plug-in, where statistically significant molecules with p-values of less than 0.05 were compared. The interactome analysis was performed using CytoScape and the Michigan Molecular Interactor plug-in ([mimi.ncibi.org](http://mimi.ncibi.org)). Full interactome analysis was carried out by connecting molecules through neighboring proteins, whereas the condensed protein-protein interaction analysis was performed by searching for direct associations. The paradigm of this analysis is that molecules with similar cellular involvement tend to cluster together through physical interactions, such as molecular machines. The disease analysis is based on known or inferred genetic disorders associated with mutations of specific genes using the Online Mendelian Inheritance in Man database for data mining. An additional pathway analysis was carried out using the Kyoto encyclopedia of genes and genomes (KEGG) database, where KEGG accession numbers of the statistically significant molecules were used for mapping-queries. Additionally, disease-specific descriptions were retrieved from the Online Mendelian Inheritance in Man (OMIM) database as well as the UniProt database. Cellular expression data was also obtained from the latter resource.

## Western blot analysis

To determine the protein levels of Transthyretin, Apolipoprotein A 1, Alpha-1 Antitrypsin, Serotransferrin and Retinol-binding protein 3 we obtained vitreous fluid as described above. The extracted proteins (20  $\mu$ l/5  $\mu$ g protein) were loaded and subjected to 12.5% sodium dodecyl sulfate-polyacrylamide gel electrophoresis (SDS-PAGE) for 30 min at 100 V and then 90 min at 150 V and subsequently transferred onto nitrocellulose membranes using Trans-Blot Turbo Transfer System (Bio-Rad, Hercules, CA, USA). The membranes were blocked for 1 h at room temperature in blocking buffer consisting of 5% BSA in PBS and 0.1% Tween. This was followed by a 4 $\times$ 5 min washing procedure in Wash Buffer (PBS + 0.1% Tween). Blots were incubated with primary antibodies (Santa Cruz Biotechnology) for 2 h at 4°C followed by incubation with secondary antibodies conjugated to horseradish peroxidase (Santa Cruz Biotechnology) for 2 h at 4°C. Blots were visualized with enhanced chemiluminescence (Amersham Biosciences, Piscataway, NJ, USA).

## Results

### Sequencing of tryptic peptides

Using LC-MS/MS, 622 of the tryptic peptides detected with CE-MS could be identified. The mass of sequenced peptides ranged between 804 and 3953 Da. These tryptic peptides corresponded to 97 different proteins in vitreous humor (**Table 2**).

### Definition of AMD-specific proteins

**Figure 1** is a descriptive presentation of the study setup and findings. All samples were analysed by CE-MS. Next, for statistical analysis, CE-MS detected tryptic peptides were matched to the sequences identified by LC-MS/MS. 622 of the CE-MS detected peptides could be identified by their amino acid sequence. These peptides were combined to 97 proteins as described [29] and this protein distribution was statistically analysed. 19 proteins displayed significant differential abundance in vitreous (**Table 3**). All proteins with a p-value of <0.05 were found to be upregulated in the AMD population.

## Validation using Western blot analysis

Western blot analysis was used to verify the findings in **table 3** on 5 randomly selected proteins for which antibodies were readily available, using a new but small set of AMD and control samples (n = 4/group). Four out of the 5 proteins analyzed did not display a significant variation, but the fold increases for apolipoprotein A1 and transthyretin suggested increased expression in vitreous of AMD patients similarly to what observed in the initial CE-MS experiments. The absence of significance is most probably due to the small patient population used for in the validation experiments (**Table 4** and **Figure 2**). However, we validated increased alpha-1-antitrypsin abundance in vitreous of AMD patients (p = 0.02).

## Gene enrichment and pathway analysis

The 19 proteins with differential abundance in AMD were analyzed for their biological process, molecular function and the cellular component. GO cluster analysis using ClueGO showed that these proteins are primarily involved in biological (ion) transport and secretion/exocytosis (platelet degranulation (ALB, TF, APOA1, SERPINA1, HRG, FGA) and fatty acid binding (RBP3, ALB, PTGDS)), protease inhibitor activity (ITIH1, SERPINA1, SERPINC1, HRG), and processes involving hydrogen peroxide (GPX3, HP). These molecules consist mostly of secreted proteins (**Figure 3A**).

A global interactome analysis of the statistically relevant proteins using the Michigan Molecular Interactor plug-in, which mines data from protein-protein, protein-gene, gene-gene, molecule-pathway, and molecule-keyword associations, resulted in a densely interconnected network (**Figure 3B**). This expanded network of 54 proteins, including molecules known to be associated with the query molecules, consists of an immunoglobulin-cluster and complement activation (containing IGHA1, IGKC, IGHG1, IGLC2, AHSG, ITIH1, and FGA), suggesting inflammation and acute phase response processes being activated in the original source tissue, and processes including cell adhesion, lipid metabolism (RBP3, PTGDS), transport (APOA1, ALB, TTR, TF), anti-apoptosis (GPX3), and proteolysis (proteases (HP) and protease inhibitors (HRG, SERPINA1 and SERPINC1)). Inter-linking molecules suggest an involvement of transcriptional elements such as ONECUT and HNF1A/4A, which are modulators of genes involved in lipid metabolic processes, blood coagulation

Analysis of the condensed network of direct interactions between the 19 proteins shows the immunoglobulin cluster containing IGLC2, IGKC, and IGHG1, binary interactions between ALB and ITIH1, and between HRG and FGA, as well as a binary cluster of APOA1 and TTR. The latter suggests that the peroxisome proliferator-activated receptor (PPAR) signaling pathway is perturbed in AMD through an association with TTR and fibrils (**Figure 3B**).

Data mining of the Online Mendelian Inheritance in Man database by associated disease clustering showed one relevant cluster consisting of APOA1 (cataract formation) and TTR (fibril formation (neurodegenerative)). The same components were also found by association using a similar approach to mine the disease entries in the KEGG database, where the common denominator was found as familial amyloidosis (KEGG disease entry H00845), linking it to the complement and coagulation cascade (**Figure 3C**). Furthermore KEGG pathway analysis also suggested an involvement of arachidonic acid metabolism to be modulated in AMD. Literature mining also revealed a semantic link between cataract formation and up-regulated levels of GPX3 in the lens.

**Table 2.** Proteins in vitreous humor detected by CE-MS and identified by LC-MS/MS analysis.

| Protein                                   | UniProt* | Peptide number** | Coverage*** (%) | Peptide number control**** | Peptide number case**** |
|-------------------------------------------|----------|------------------|-----------------|----------------------------|-------------------------|
| Actin, aortic smooth muscle               | P62736   | 1                | 3               | 0                          | 1                       |
| Afamin                                    | P43652   | 2                | 4               | 2                          | 2                       |
| Angiotensinogen                           | P01019   | 1                | 2               | 1                          | 1                       |
| Alpha-1-acid glycoprotein 1               | P02763   | 7                | 27              | 7                          | 7                       |
| Alpha-1-acid glycoprotein 2               | P19652   | 3                | 15              | 3                          | 3                       |
| Alpha-1-antitrypsin                       | P01009   | 20               | 52              | 20                         | 20                      |
| Alpha-1B-glycoprotein                     | P04217   | 5                | 11              | 5                          | 5                       |
| Alpha-2-HS-glycoprotein                   | P02765   | 4                | 16              | 4                          | 4                       |
| Alpha-2-macroglobulin                     | P01023   | 13               | 10              | 9                          | 13                      |
| Alpha-crystallin B chain                  | P02511   | 2                | 14              | 1                          | 2                       |
| Amyloid-like protein 2                    | Q06481   | 2                | 4               | 2                          | 2                       |
| Antithrombin-III                          | P01008   | 10               | 23              | 4                          | 10                      |
| Apolipoprotein E                          | P02649   | 13               | 43              | 12                         | 13                      |
| Apolipoprotein A-I                        | P02647   | 18               | 63              | 16                         | 18                      |
| Apolipoprotein A-II                       | P02652   | 4                | 41              | 4                          | 4                       |
| Apolipoprotein A-IV                       | P06727   | 10               | 30              | 5                          | 10                      |
| Beta-2-microglobulin                      | P61769   | 2                | 17              | 1                          | 2                       |
| Beta-crystallin B2                        | P43320   | 11               | 50              | 11                         | 11                      |
| Chitinase-3-like protein 1                | P36222   | 1                | 3               | 1                          | 1                       |
| Ceruloplasmin                             | P00450   | 14               | 20              | 12                         | 14                      |
| Clusterin                                 | P10909   | 12               | 31              | 11                         | 12                      |
| Collagen alpha-1(I) chain                 | P02452   | 2                | 1               | 2                          | 2                       |
| Collagen alpha-1(II) chain                | P02458   | 38               | 27              | 35                         | 36                      |
| Collagen alpha-1(III) chain               | P02461   | 1                | 2               | 1                          | 1                       |
| Collagen alpha-1(IX) chain                | P20849   | 5                | 9               | 4                          | 5                       |
| Collagen alpha-1(V) chain                 | P20908   | 4                | 1               | 2                          | 3                       |
| Collagen alpha-1(XI) chain                | P12107   | 5                | 3               | 5                          | 5                       |
| Collagen alpha-1(XII) chain               | Q99715   | 1                | 1               | 1                          | 1                       |
| Collagen alpha-1(XXII) chain              | Q8NFW1   | 1                | 1               | 1                          | 1                       |
| Collagen alpha-1(XXIII) chain             | Q86Y22   | 1                | 3               | 1                          | 1                       |
| Collagen alpha-1(XXVIII) chain            | Q2UY09   | 1                | 2               | 0                          | 1                       |
| Collagen alpha-2(IX) chain                | Q14055   | 4                | 6               | 4                          | 4                       |
| Collagen alpha-2(XI) chain                | P13942   | 1                | 2               | 1                          | 1                       |
| Collagen alpha-3(IX) chain                | Q14050   | 5                | 7               | 5                          | 5                       |
| Complement C3                             | P01024   | 32               | 23              | 23                         | 32                      |
| Complement C4-B                           | P0C0L5   | 11               | 7               | 10                         | 11                      |
| Complement factor B                       | P00751   | 5                | 7               | 3                          | 5                       |
| Alpha-crystallin A chain                  | P02489   | 3                | 19              | 3                          | 3                       |
| Cathepsin D                               | P07339   | 3                | 11              | 3                          | 3                       |
| Cystatin-C                                | P01034   | 2                | 18              | 2                          | 2                       |
| Dermcidin                                 | P81605   | 3                | 23              | 1                          | 3                       |
| Dickkopf-related protein 3                | Q9UBP4   | 6                | 22              | 6                          | 6                       |
| Double-strand break repair protein MRE11A | P49959   | 1                | 2               | 0                          | 1                       |
| Fibrinogen alpha chain                    | P02671   | 4                | 6               | 3                          | 4                       |
| Fibrinogen beta chain                     | P02675   | 1                | 3               | 1                          | 1                       |
| Gelsolin                                  | P06396   | 1                | 2               | 0                          | 1                       |
| Glutathione peroxidase 3                  | P22352   | 4                | 23              | 3                          | 4                       |
| Haptoglobin                               | P00738   | 13               | 24              | 10                         | 13                      |

**Table 2. Cont.**

| Protein                                      | UniProt* | Peptide number** | Coverage*** (%) | Peptide number control**** | Peptide number case**** |
|----------------------------------------------|----------|------------------|-----------------|----------------------------|-------------------------|
| Hemoglobin subunit beta                      | P68871   | 1                | 9               | 1                          | 1                       |
| Hemopexin                                    | P02790   | 14               | 29              | 12                         | 14                      |
| Heparin cofactor 2                           | P05546   | 1                | 2               | 1                          | 1                       |
| Histidine-rich glycoprotein                  | P04196   | 2                | 4               | 2                          | 2                       |
| Ig alpha-1 chain C region                    | P01876   | 3                | 8               | 3                          | 3                       |
| Ig alpha-2 chain C region                    | P01877   | 4                | 8               | 2                          | 2                       |
| Ig gamma-1 chain C region                    | P01857   | 11               | 37              | 11                         | 11                      |
| Ig gamma-3 chain C region                    | P01860   | 4                | 12              | 3                          | 4                       |
| Ig heavy chain V-III region GAL              | P01781   | 2                | 8               | 1                          | 2                       |
| Ig heavy chain V-III region TRO              | P01762   | 1                | 6               | 1                          | 1                       |
| Ig kappa chain V-I region EU                 | P01598   | 1                | 17              | 1                          | 1                       |
| Ig kappa chain V-III region SIE              | P01620   | 1                | 17              | 1                          | 1                       |
| Ig kappa chain C region                      | P01834   | 5                | 80              | 4                          | 5                       |
| Ig lambda-2 chain C regions                  | P0CG05   | 3                | 42              | 3                          | 3                       |
| IgGfC-binding protein                        | Q9Y6R7   | 4                | 1               | 4                          | 4                       |
| Immunoglobulin lambda-like polypeptide 5     | B9A064   | 1                | 9               | 1                          | 1                       |
| Inter-alpha-trypsin inhibitor heavy chain H1 | P19827   | 3                | 4               | 3                          | 3                       |
| Inter-alpha-trypsin inhibitor heavy chain H4 | Q14624   | 2                | 2               | 1                          | 2                       |
| Keratin, type I cytoskeletal 10              | P13645   | 18               | 34              | 16                         | 18                      |
| Keratin, type I cytoskeletal 14              | P02533   | 3                | 7               | 2                          | 3                       |
| Keratin, type I cytoskeletal 9               | P35527   | 7                | 14              | 6                          | 7                       |
| Keratin, type II cytoskeletal 1              | P04264   | 18               | 26              | 17                         | 17                      |
| Keratin, type II cytoskeletal 2 epidermal    | P35908   | 3                | 6               | 3                          | 3                       |
| Keratin, type II cytoskeletal 5              | P13647   | 1                | 2               | 1                          | 1                       |
| Keratin, type II cytoskeletal 6A             | P02538   | 1                | 2               | 1                          | 1                       |
| Keratin, type II cytoskeletal 6B             | P04259   | 2                | 4               | 2                          | 2                       |
| Kininogen-1                                  | P01042   | 4                | 5               | 2                          | 4                       |
| Leucine-rich alpha-2-glycoprotein            | P02750   | 1                | 3               | 0                          | 1                       |
| Opticin                                      | Q9UBM4   | 3                | 9               | 2                          | 3                       |
| Osteopontin                                  | P10451   | 7                | 34              | 7                          | 7                       |
| Pigment epithelium-derived factor            | P36955   | 12               | 31              | 11                         | 12                      |
| Plasminogen                                  | P00747   | 1                | 1               | 0                          | 1                       |
| Prostaglandin-H2 D-isomerase                 | P41222   | 4                | 21              | 4                          | 4                       |
| Protein Jade-2                               | Q9NQC1   | 1                | 1               | 1                          | 1                       |
| Protein S100-A7                              | P31151   | 1                | 11              | 1                          | 1                       |
| Protein S100-A9                              | P06702   | 2                | 18              | 2                          | 2                       |
| Prothrombin                                  | P00734   | 2                | 4               | 2                          | 2                       |
| Retinol-binding protein 3                    | P10745   | 15               | 18              | 14                         | 15                      |
| Ig kappa chain V-III region VG               | P04433   | 2                | 23              | 1                          | 2                       |
| Plasma protease C1 inhibitor                 | P05155   | 5                | 12              | 5                          | 5                       |
| Serotransferrin                              | P02787   | 44               | 55              | 43                         | 44                      |
| Alpha-1-antichymotrypsin                     | P01011   | 15               | 36              | 12                         | 15                      |
| Serum albumin                                | P02768   | 55               | 75              | 51                         | 55                      |
| Complement C4-A                              | P0C0L4   | 1                | 1               | 1                          | 1                       |
| Titin                                        | Q8WZ42   | 1                | 0               | 0                          | 1                       |
| Transthyretin                                | P02766   | 7                | 63              | 7                          | 7                       |
| Vitamin D-binding protein                    | P02774   | 5                | 9               | 4                          | 5                       |
| Vitronectin                                  | P04004   | 3                | 9               | 2                          | 3                       |

**Table 2. Cont.**

| Protein                   | UniProt* | Peptide number** | Coverage*** (%) | Peptide number control**** | Peptide number case**** |
|---------------------------|----------|------------------|-----------------|----------------------------|-------------------------|
| Zinc-alpha-2-glycoprotein | P25311   | 2                | 9               | 2                          | 2                       |

\*UniProt accession numbers that can be found on [www.uniprot.org](http://www.uniprot.org); \*\* Number of peptides observed by CE-MS analysis and sequenced by LC-MS/MS for each identified protein; \*\*\* Percentage of peptide coverage of the protein sequence; \*\*\*\*, Number of peptides observed by CE-MS and sequenced by LC-MS/MS in controls or cases.

doi:10.1371/journal.pone.0096895.t002

## Discussion

The aim of this pilot study was to test the hypothesis that specific proteins in vitreous samples of patients with exudative AMD are significantly associated with the disease and may lead to a better understanding of the pathophysiology of the disease.

We initially set out to analyze native peptides from vitreous (top-down strategy) with a mass of up to 20 kDa using CE-MS analysis. However, this strategy did not result in satisfactory data, as a result of high variability (Koss M et al. Proteomics in AMD; Poster 2927/A327 at the annual meeting of the Association for Research in Vision and Ophthalmology (AVRO), Ft.Lauderdale, USA in 2012). A possible reason for the large variation between the measurements could be the presence of hyaluronic acid. Because of the highly negative charge of its monomers, hyaluronic acid reacts with positively charged proteins such as albumin to build up polyelectrolyte complexes displaying low solubility [32]. Since the

top-down strategy failed to give the expected results, we changed the strategy and in the current study employed trypsin digested samples for proteome analysis of vitreous.

Using this bottom-up approach we could successfully analyze the vitreous humor samples with CE-MS, including fragments of proteins with molecular masses above 20 kDa. We identified a total of 97 proteins, 19 of those significantly increased in AMD patients. We selected 5 random proteins among these 19 for validation by Western blot analysis. One protein (alpha-1-antitrypsin) reached statistical significance while two others (transthyretin and apolipoprotein A1) displayed a non-significant but increased abundance in AMD. The latter is most likely due to the low number of patients in the validation set (n = 4/group) and needs validation.

Most of the upregulated proteins in AMD patients are plasma proteins. Our findings therefore may, to some degree, be

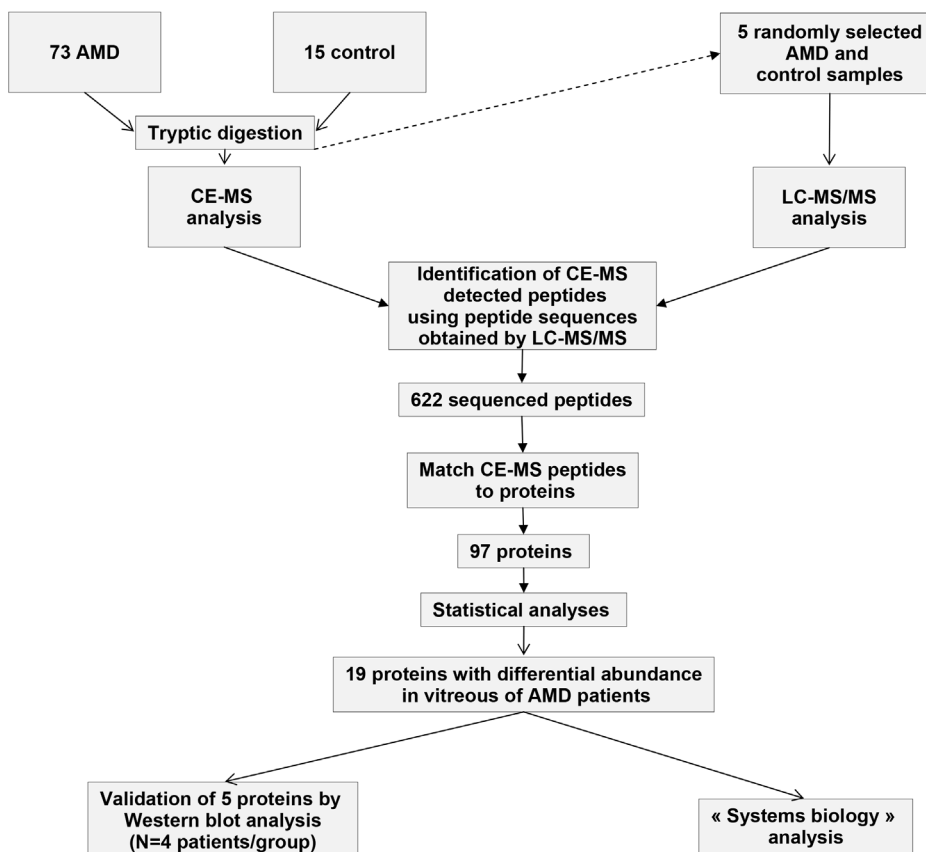

**Figure 1. Study design and results.**

doi:10.1371/journal.pone.0096895.g001



**Table 3.** List of significant regulated proteins.

| Protein name                                 | Fold change AMD/<br>control | Standard<br>deviation for fold<br>change | p-value         | adjusted p-value |
|----------------------------------------------|-----------------------------|------------------------------------------|-----------------|------------------|
| Ig kappa/lambda chain C region               | 6.56                        | 13.27                                    | <b>4.58E-06</b> | <b>4.45E-04</b>  |
| Serum albumin                                | 1.91                        | 1.49                                     | <b>3.27E-05</b> | <b>1.58E-03</b>  |
| Ig gamma-1 chain C region                    | 3.14                        | 4.70                                     | <b>6.54E-05</b> | <b>1.74E-03</b>  |
| Antithrombin-III                             | 5.50                        | 12.29                                    | <b>7.16E-05</b> | <b>1.74E-03</b>  |
| Ig lambda-2 chain C regions                  | 4.55                        | 9.94                                     | <b>1.30E-04</b> | <b>2.51E-03</b>  |
| Serotransferrin*                             | 1.74                        | 1.52                                     | <b>3.99E-04</b> | <b>6.45E-03</b>  |
| Afamin                                       | 3.28                        | 6.58                                     | <b>1.93E-03</b> | <b>2.16E-02</b>  |
| Histidine-rich glycoprotein                  | 10.85                       | 49.18                                    | <b>2.45E-03</b> | <b>2.16E-02</b>  |
| Retinol-binding protein 3*                   | 2.78                        | 5.51                                     | <b>2.72E-03</b> | <b>2.20E-02</b>  |
| Apolipoprotein A-I*                          | 2.30                        | 3.62                                     | <b>3.88E-03</b> | <b>2.73E-02</b>  |
| Fibrinogen alpha chain                       | 2.90                        | 6.30                                     | <b>3.94E-03</b> | <b>2.73E-02</b>  |
| Ig alpha-1 chain C region                    | 35.34                       | 147.90                                   | <b>2.32E-03</b> | <b>2.16E-02</b>  |
| Alpha-2-HS-glycoprotein                      | 2.58                        | 5.78                                     | <b>1.55E-02</b> | 8.70E-02         |
| Transthyretin*                               | 1.74                        | 2.11                                     | <b>1.61E-02</b> | 8.70E-02         |
| Prostaglandin-H2 D-isomerase                 | 1.65                        | 1.97                                     | <b>2.33E-02</b> | 1.19E-01         |
| Haptoglobin                                  | 2.92                        | 7.89                                     | <b>3.34E-02</b> | 1.46E-01         |
| Glutathione peroxidase 3                     | 4.26                        | 18.42                                    | <b>3.79E-02</b> | 1.51E-01         |
| Alpha-1-antitrypsin*                         | 1.73                        | 2.56                                     | <b>4.04E-02</b> | 1.51E-01         |
| Inter-alpha-trypsin inhibitor heavy chain H1 | 2.34                        | 5.84                                     | <b>4.82E-02</b> | 1.67E-01         |

Legend: Fold change AMD/control. Fold increase or decrease observed in AMD patients compared to controls; p-value - unadjusted p-value (Wilcoxon signed-rank test); adjusted p-value - p-value corrected for multiple testing (Benjamini and Hochberg method) and expressed in bold, when statistically significant. \* proteins selected for western-blot analysis.

doi:10.1371/journal.pone.0096895.t003

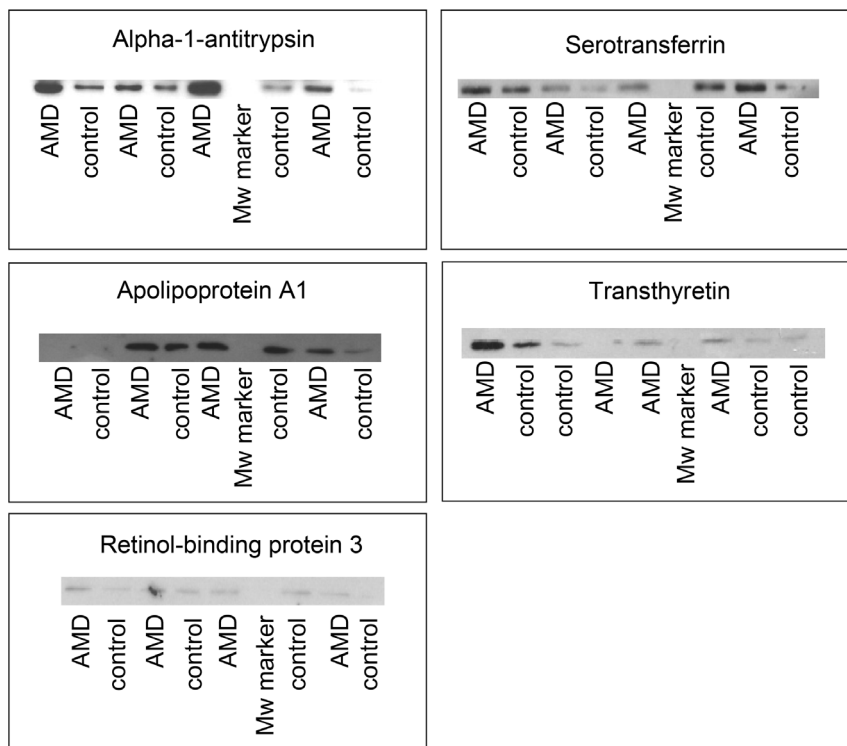

**Figure 2. Western blot validation of candidate markers for AMD.** Representative Western blots of analysis of expression of selected vitreous proteins.

doi:10.1371/journal.pone.0096895.g002



**Table 4.** Western blot analysis of selected proteins found upregulated in vitreous of AMD patients by CE-MS.

| Protein name              | AMD          | control      | P-value  | Fold change | Regulation in proteome analysis |
|---------------------------|--------------|--------------|----------|-------------|---------------------------------|
| Alpha-1-Antitrypsin       | 1618.6±610.2 | 689.5±174.1  | p = 0.02 | 2.35        | ↑                               |
| Apolipoprotein A 1        | 1925.3±404.9 | 1463.2±360.4 | p = 0.27 | 1.32        | ↑                               |
| Retinol-binding protein 3 | 471.9±50.9   | 427.3±53.9   | p = 0.28 | 1.10        | ↑                               |
| Serotransferrin           | 1224.1±231.1 | 1059.6±247.7 | p = 0.25 | 1.16        | ↑                               |
| Transthyretin             | 1169.8±592.8 | 747.4±143.8  | p = 0.15 | 1.57        | ↑                               |

Presented are the results of intensities measured by enhanced chemiluminescence from SDS PAGE Western blots. The mean ± standard deviation from 4 independent undiluted vitreous AMD and 4 independent undiluted vitreous control samples is given. P-values were calculated by the Mann-Whitney statistical test. doi:10.1371/journal.pone.0096895.t004

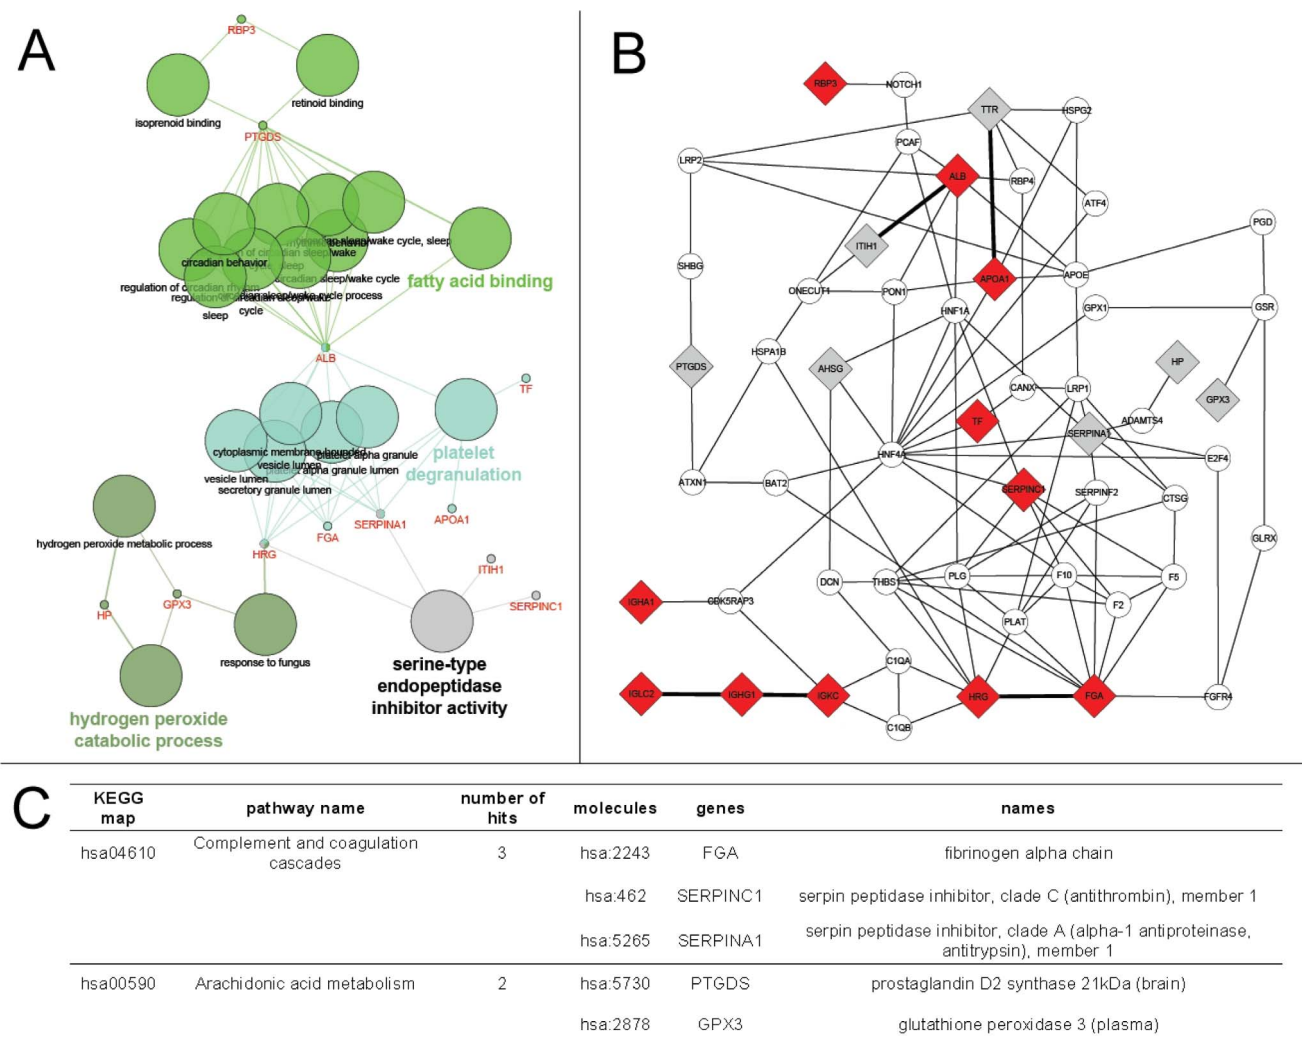

**Figure 3. Bioinformatic analysis of identified biomarkers.** **A.** Gene ontology analysis shows proteins involved in fatty acid binding, platelet degranulation, serine protease inhibitor activity and hydrogen peroxide catabolic processes. **B** Interaction network of identified biomarker candidates involving 18 out of the 19 proteins. Proteins involved in inflammation, acute phase response (including cellular adhesion), signaling via lipid-mediated pathways (including transport) and activation of proteolytic cascades, as well as transcriptional activity are indicated. Red diamonds indicate proteins which are significant after correction for multiple testing, and grey ones are the remainder of the query set. Circles indicate gap-fillers which were added to connect proteins via protein-protein interactions. Direct association between the significant biomarker set are indicated by a bold line, and relate to immune response (immunoglobulin cluster), protease inhibitor activity, and an activation of the peroxisome proliferator-activated receptor signaling pathway/CDC42 signal transduction pathway, as suggested through APOA1 interactions. **C.** Kyoto encyclopedia of genes and genomes pathway analysis. Statistically relevant biomarker proteins were mapped onto KEGG pathway maps and showed an involvement of fibril formation and inhibition of fibrinolysis in the coagulation cascade and association with arachidonic acid metabolism. doi:10.1371/journal.pone.0096895.g003

representative of the leakage from exudative CNV into the vitreous. Even though plasma proteins might not be responsible for the onset of an exudative AMD, their levels might be of diagnostic value for disease and represent the underlying pathophysiology of AMD. Future studies are important to identify which of these proteins are secreted from the abnormal CNV tissue.

The observed upregulation of a number of proteins in vitreous of AMD patients provides further insights into the pathophysiology of AMD:

### Transport proteins

Upregulation of transport proteins such as albumin and serotransferrin in AMD patients confirms the findings from previous proteome analyses of anterior chamber fluids [5]. In addition, further transport proteins like transthyretin and apolipoprotein A-I were identified. All of these were upregulated in the AMD group; all are biologically essential for cell homeostasis (albumin) and are carriers of hormones like retinol (albumin and transthyretin) or ions (serotransferrin). It is important to stress that in chronic diseases, such as AMD, the dysregulation of these abundant proteins has been observed in serum [33,34], but so far, their presence in the vitreous has received little attention.

### Inflammatory proteins

Immunoglobulin heavy chains and alpha-1-antitrypsin were upregulated in the AMD samples. Alpha-1-antitrypsin is an acute phase protein member of the serpin family that inhibits a wide variety of proteases and thereby protects tissues from enzymes of inflammatory cells, especially neutrophil elastase. This is the first time that increased alpha-1-antitrypsin abundance in vitreous has been associated with AMD. However alpha-1-antitrypsin does not seem specific for AMD since upregulation of alpha-1-antitrypsin was observed in both aqueous and blood of patients with glaucoma [35].

### Mediators of coagulation

Fibrinogen is essential during coagulation as it is converted by plasmin into fibrin, and higher blood levels have been associated with AMD [36]. Rheopheresis, a treatment that microfilters fibrinogen from the blood of AMD patients, seems to be protective in the progression of AMD, however, the approach is controversial discussed [37]. In this study, we demonstrated that the fibrinogen alpha chain was upregulated in the AMD group. As for alpha-1-antitrypsin, although potentially involved in the pathophysiology of AMD, increased fibrinogen abundance in vitreous is not specific for AMD since such upregulation was previously also observed in vitreous samples of patients with diabetic retinopathy [38].

### Specific ocular markers

In humans, prostaglandin H<sub>2</sub>-D isomerase catalyzes the conversion of prostaglandin H<sub>2</sub> to prostaglandin D<sub>2</sub>, which functions as a neuromodulator and as a trophic factor in the central nervous system for fatty acid biosynthesis. Its occurrence has been described in proliferative diabetic retinopathy; but it has

not been previously associated with AMD [39]. The interphotoreceptor retinol binding protein is a large glycoprotein, located in the extracellular matrix between the RPE and the photoreceptors. It is known to bind retinoids and is thought to transport retinoids between the retinal pigment epithelium and the photoreceptors. Its potential involvement in AMD has recently been described based on the analysis of blood samples [40,41] and is confirmed by our findings.

The bioinformatic analyses using GO-term clustering, physical interaction module assembly, and KEGG pathway data mapping have shown an involvement of pathways consisting of fatty acid binding and transport, exocytosis, and protease inhibitory activity, which are also partially involved in Complement and coagulation cascades. However, more importantly is the notion that there appears to be an up-regulation of hydrogen peroxide catabolic processes, which suggest that oxidative stress is exerted in AMD.

The interactome analysis surprisingly showed a highly interconnected network of 18 of the 19 relevant proteins, where only 36 additional molecules were needed to generate a specific molecular network, suggesting that the up-regulated proteins form a potential dysregulated functional cluster encompassing immune responses and complement cascade proteins, protease cascades maybe linked to the membrane attack complex or possibly to counteract the enzymatic effect of up-regulated molecules such as GPX3, RBP3 and PTGDS, or as modulators of gene activation cascades. This unusually high selectivity also argues against the hypothesis that these proteins are observed in increased abundance merely as a result of unspecific leakage of plasma proteins, and support the hypothesis that the increase in these proteins is specifically linked to AMD.

The up-regulation of GPX3 is of particular interest, since it was shown previously that cataracts contain elevated levels of oxidants such as dehydroascorbic acid (DHA), indicative of oxidative stress, linked to a potentially elevated level of extracellular glutathione peroxidase GPX3 [42]. Mechanistically, the over-expression is suggested to result in accumulated oxidants in the glutathion/ascorbic acid homeostasis cycle, leading to DHA-polymer crystal formation in the lens as well as potentially toxic breakdown products of ascorbic acid.

In conclusion, in this study we could demonstrate that a bottom-up approach combining CE-MS (for protein selection) and LC-MS/MS (for protein identification) led to the identification of 19 candidate proteins in undiluted vitreous of AMD patients. Even with the limitations of this study (e.g., demographic matching, demand for validation in a larger cohort with a wider set of clinical parameters), the novel information gained from this study of a high number of undiluted vitreous samples provides additional insight into the pathophysiology of wet AMD.

### Author Contributions

Conceived and designed the experiments: MK HM JH JPS FK. Performed the experiments: MK JH NN HM HH JJ FK. Analyzed the data: MK JH RR WM JK JS WM JPS. Contributed reagents/materials/analysis tools: JH MK NN JS KK HM JJ. Wrote the paper: MK JH TB JS MP JPS.

### References

- Evans JR (2001) Risk factors for age-related macular degeneration. *Progress in retinal and eye research* 20: 227–253.
- Stefansson E (2009) Physiology of vitreous surgery. *Graefes Arch Clin Exp Ophthalmol* 247: 147–163.
- Adams AP, Shima DT, Tolentino MJ, Gragoudas ES, Ferrara N, et al. (1996) Inhibition of vascular endothelial growth factor prevents retinal ischemia-associated iris neovascularization in a nonhuman primate. *Archives of ophthalmology* 114: 66–71.
- Funk M, Karl D, Georgopoulos M, Benesch T, Sacu S, et al. (2009) Neovascular age-related macular degeneration: intraocular cytokines and growth factors and the influence of therapy with ranibizumab. *Ophthalmology* 116: 2393–2399.
- Grossniklaus HE, Green WR (2004) Choroidal neovascularization. *Am J Ophthalmol* 137: 496–503.
- Kim TW, Kang JW, Ahn J, Lee EK, Cho KC, et al. (2012) Proteomic analysis of the aqueous humor in age-related macular degeneration (AMD) patients. *Journal of proteome research* 11: 4034–4043.

7. Ecker SM, Hines JC, Pfahler SM, Glaser BM (2011) Aqueous cytokine and growth factor levels do not reliably reflect those levels found in the vitreous. *Molecular vision* 17: 2856–2863.
8. Stefansson E, Lofsson T (2006) The Stokes-Einstein equation and the physiological effects of vitreous surgery. *Acta Ophthalmol Scand* 84: 718–719.
9. Angi M, Kalirai H, Coupland SE, Damato BE, Semeraro F, et al. (2012) Proteomic analyses of the vitreous humour. *Mediators of inflammation* 2012: 148039.
10. Ecker SM, Pfahler SM, Hines JC, Lovelace AS, Glaser BM (2012) Sequential in-office vitreous aspirates demonstrate vitreous matrix metalloproteinase 9 levels correlate with the amount of subretinal fluid in eyes with wet age-related macular degeneration. *Molecular vision* 18: 1658–1667.
11. Grus FH, Joachim SC, Pfeiffer N (2007) Proteomics in ocular fluids. *Proteomics Clinical applications* 1: 876–888.
12. Noma H, Funatsu H, Yamasaki M, Tsukamoto H, Mimura T, et al. (2008) Aqueous humour levels of cytokines are correlated to vitreous levels and severity of macular oedema in branch retinal vein occlusion. *Eye* 22: 42–48.
13. Pfister M, Koch FH, Cinat J, Rothweiler F, Schubert R, et al. (2012) [Cytokine determination from vitreous samples in retinal vascular diseases.]. *Der Ophthalmologe: Zeitschrift der Deutschen Ophthalmologischen Gesellschaft*.
14. Walia S, Clermont AC, Gao BB, Aiello LP, Feener EP (2010) Vitreous proteomics and diabetic retinopathy. *Seminars in ophthalmology* 25: 289–294.
15. Yamane K, Minamoto A, Yamashita H, Takamura H, Miyamoto-Myoken Y, et al. (2003) Proteome analysis of human vitreous proteins. *Molecular & cellular proteomics: MCP* 2: 1177–1187.
16. Bennett KL, Funk M, Tschernutter M, Breitwieser FP, Panyavsky M, et al. (2011) Proteomic analysis of human cataract aqueous humour: Comparison of one-dimensional gel LCMS with two-dimensional LCMS of unlabelled and iTRAQ(R)-labelled specimens. *Journal of proteomics* 74: 151–166.
17. Chowdhury UR, Jea SY, Oh DJ, Rhee DJ, Fautsch MP (2011) Expression profile of the matricellular protein osteopontin in primary open-angle glaucoma and the normal human eye. *Investigative ophthalmology & visual science* 52: 6443–6451.
18. Cryan LM, O'Brien C (2008) Proteomics as a research tool in clinical and experimental ophthalmology. *Proteomics Clinical applications* 2: 762–775.
19. Zurbig P, Renfrow MB, Schiffer E, Novak J, Walden M, et al. (2006) Biomarker discovery by CE-MS enables sequence analysis via MS/MS with platform-independent separation. *Electrophoresis* 27: 2111–2125.
20. Mischak H, Vlahou A, Ioannidis JP (2013) Technical aspects and inter-laboratory variability in native peptide profiling: the CE-MS experience. *Clinical biochemistry* 46: 432–443.
21. Mischak H, Julian BA, Novak J (2007) High-resolution proteome/peptidome analysis of peptides and low-molecular-weight proteins in urine. *Proteomics Clinical applications* 1: 792.
22. Koss MJ, Scholtz S, Haessler-Sinangin Y, Singh P, Koch FH (2009) Combined Intravitreal Pharmacosurgery in Patients with Occult Choroidal Neovascularization Secondary to Wet Age-Related Macular Degeneration. *Ophthalmologica* 224: 72–78.
23. Mischak H, Schanstra JP (2011) CE-MS in biomarker discovery, validation, and clinical application. *Proteomics Clinical applications* 5: 9–23.
24. Augustin AJ, Puls S, Offermann I (2007) Triple therapy for choroidal neovascularization due to age-related macular degeneration: verteporfin PDT, bevacizumab, and dexamethasone. *Retina* 27: 133–140.
25. Koch FH, Koss MJ (2011) Microincision vitrectomy procedure using Intretcor technology. *Archives of ophthalmology* 129: 1599–1604.
26. Spaide RF (2006) Rationale for combination therapies for choroidal neovascularization. *Am J Ophthalmol* 141: 149–156.
27. Theodorescu D, Wittke S, Ross MM, Walden M, Conaway M, et al. (2006) Discovery and validation of new protein biomarkers for urothelial cancer: a prospective analysis. *The lancet oncology* 7: 230–240.
28. Neuhoff N, Kaiser T, Wittke S, Krebs R, Pitt A, et al. (2004) Mass spectrometry for the detection of differentially expressed proteins: a comparison of surface-enhanced laser desorption/ionization and capillary electrophoresis/mass spectrometry. *Rapid communications in mass spectrometry: RCM* 18: 149–156.
29. Jantos-Siwij J, Schiffer E, Brand K, Schumann G, Rossing K, et al. (2009) Quantitative urinary proteome analysis for biomarker evaluation in chronic kidney disease. *Journal of proteome research* 8: 268–281.
30. Metzger J, Negm AA, Plentz RR, Weismuller TJ, Wedemeyer J, et al. (2013) Urine proteomic analysis differentiates cholangiocarcinoma from primary sclerosing cholangitis and other benign biliary disorders. *Gut* 62: 122–130.
31. Benjamini Y, Hochberg Y (1995) Controlling the false discovery rate: a practical and powerful approach to multiple testing. *J Royal Stat Soc B (Methodological)*: 125–133.
32. Wohlrab W, Neubert RRH, Wohlrab J (2004) *Hyaluronsaure und Haut*. Aachen: Shaker. 384 p.
33. Chowers I, Wong R, Dentchev T, Farkas RH, Iacovelli J, et al. (2006) The iron carrier transferrin is upregulated in retinas from patients with age-related macular degeneration. *Investigative ophthalmology & visual science* 47: 2135–2140.
34. Wysokinski D, Danisz K, Blasiak J, Dorecka M, Romaniuk D, et al. (2013) An association of transferrin gene polymorphism and serum transferrin levels with age-related macular degeneration. *Experimental eye research* 1: 14–23.
35. Boehm N, Wolters D, Thiel U, Lossbrand U, Wiegand N, et al. (2012) New insights into autoantibody profiles from immune privileged sites in the eye: a glaucoma study. *Brain, behavior, and immunity* 26: 96–102.
36. Klingel R, Fassbender C, Fischer I, Hattenbach L, Gumbel H, et al. (2002) Rheopheresis for age-related macular degeneration: a novel indication for therapeutic apheresis in ophthalmology. *Therapeutic apheresis: official journal of the International Society for Apheresis and the Japanese Society for Apheresis* 6: 271–281.
37. Klingel R, Fassbender C, Heibges A, Koch F, Nasemann J, et al. (2010) RheoNet registry analysis of rheopheresis for microcirculatory disorders with a focus on age-related macular degeneration. *Therapeutic apheresis and dialysis: official peer-reviewed journal of the International Society for Apheresis, the Japanese Society for Apheresis, the Japanese Society for Dialysis Therapy* 14: 276–286.
38. Garcia-Ramirez M, Canals F, Hernandez C, Colome N, Ferrer C, et al. (2007) Proteomic analysis of human vitreous fluid by fluorescence-based difference gel electrophoresis (DIGE): a new strategy for identifying potential candidates in the pathogenesis of proliferative diabetic retinopathy. *Diabetologia* 50: 1294–1303.
39. Kim SJ, Kim S, Park J, Lee HK, Park KS, et al. (2006) Differential expression of vitreous proteins in proliferative diabetic retinopathy. *Current eye research* 31: 231–240.
40. Morohoshi K, Ohbayashi M, Patel N, Chong V, Bird AC, et al. (2012) Identification of anti-retinal antibodies in patients with age-related macular degeneration. *Experimental and molecular pathology* 93: 193–199.
41. Morohoshi K, Patel N, Ohbayashi M, Chong V, Grossniklaus HE, et al. (2012) Serum autoantibody biomarkers for age-related macular degeneration and possible regulators of neovascularization. *Experimental and molecular pathology* 92: 64–73.
42. Kiscic B, Miric D, Zoric L, Ilic A, Dragojevic I (2012) Antioxidant capacity of lenses with age-related cataract. *Oxidative medicine and cellular longevity* 2012: 467130.
